# Supplementary material for: High-Throughput Cloning of Temperature-Sensitive Caenorhabditis elegans Mutants with Adult Syncytial Germline Membrane Architecture Defects
Source: PubMed Central journal article supplement (PMC4632044; doi:10.1534/g3.115.021451), 2015-08-26
Supplement: supp_g3.115.021451_FigureS1.pdf [file supp_g3.115.021451_FigureS1.pdf]

Figure S1

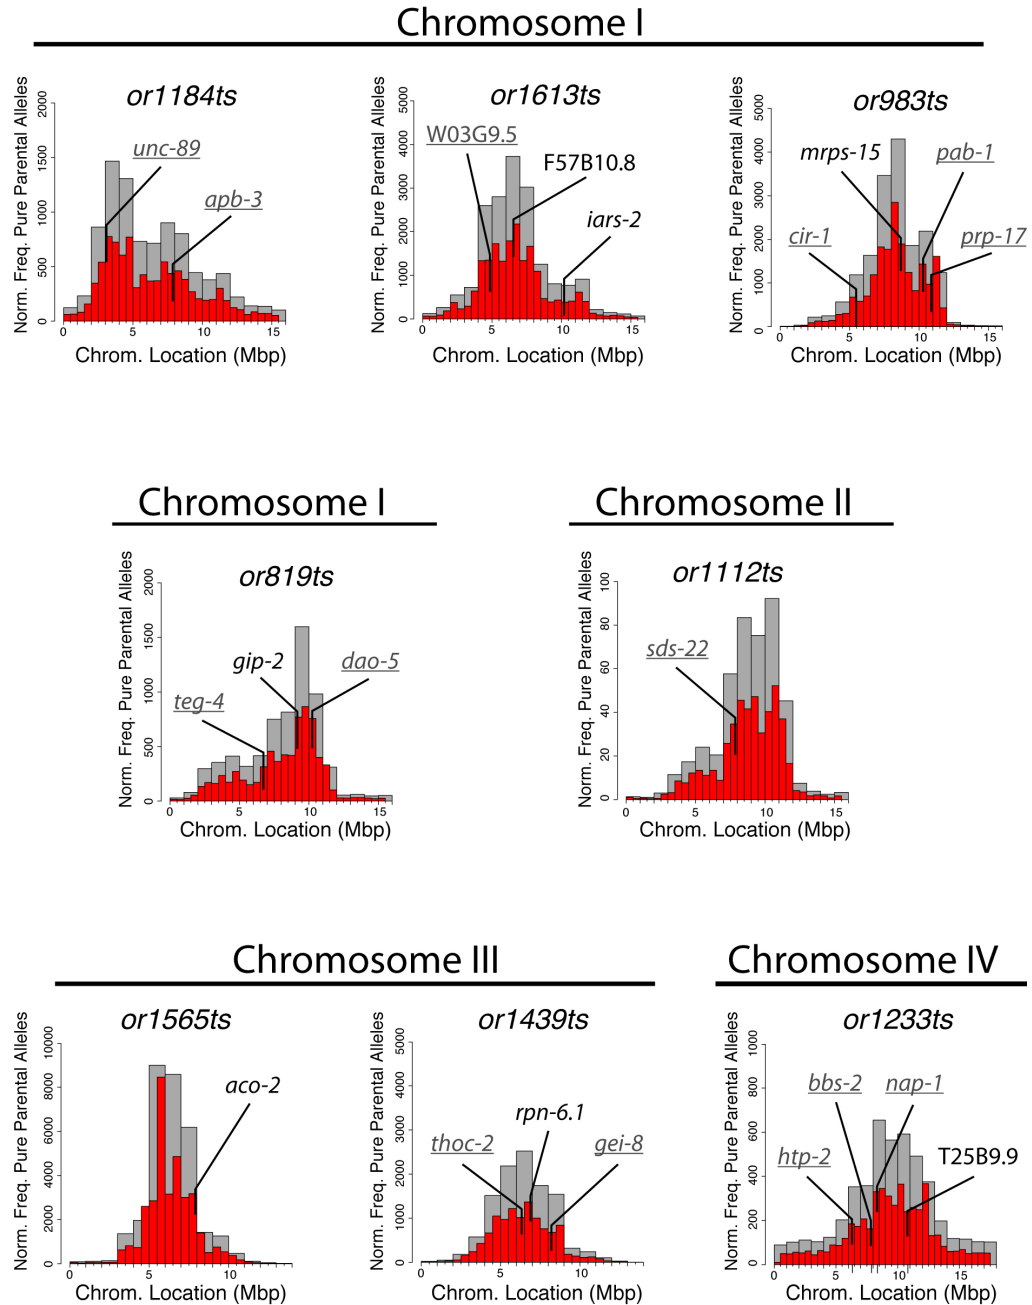

**Figure S1** SNP Mapping Data for temperature-sensitive mutations without identified causal mutations. For each mutant, the frequency of homozygous parental alleles was plotted against chromosomal position, in bins of either one megabase (grey bars) or half-megabase (red bars). Gene names on each plot are essential genes in which missense mutations were detected. Underlined gene names are those for which complementation tests were performed; in all cases the mutations complemented each other (unpublished data).
