# Supplementary material for: High-Throughput Cloning of Temperature-Sensitive Caenorhabditis elegans Mutants with Adult Syncytial Germline Membrane Architecture Defects
Source: PubMed Central journal article supplement (PMC4632044; doi:10.1534/g3.115.021451), 2015-08-26
Supplement: supp_g3.115.021451_FigureS2.pdf [file supp_g3.115.021451_FigureS2.pdf]

Figure S2

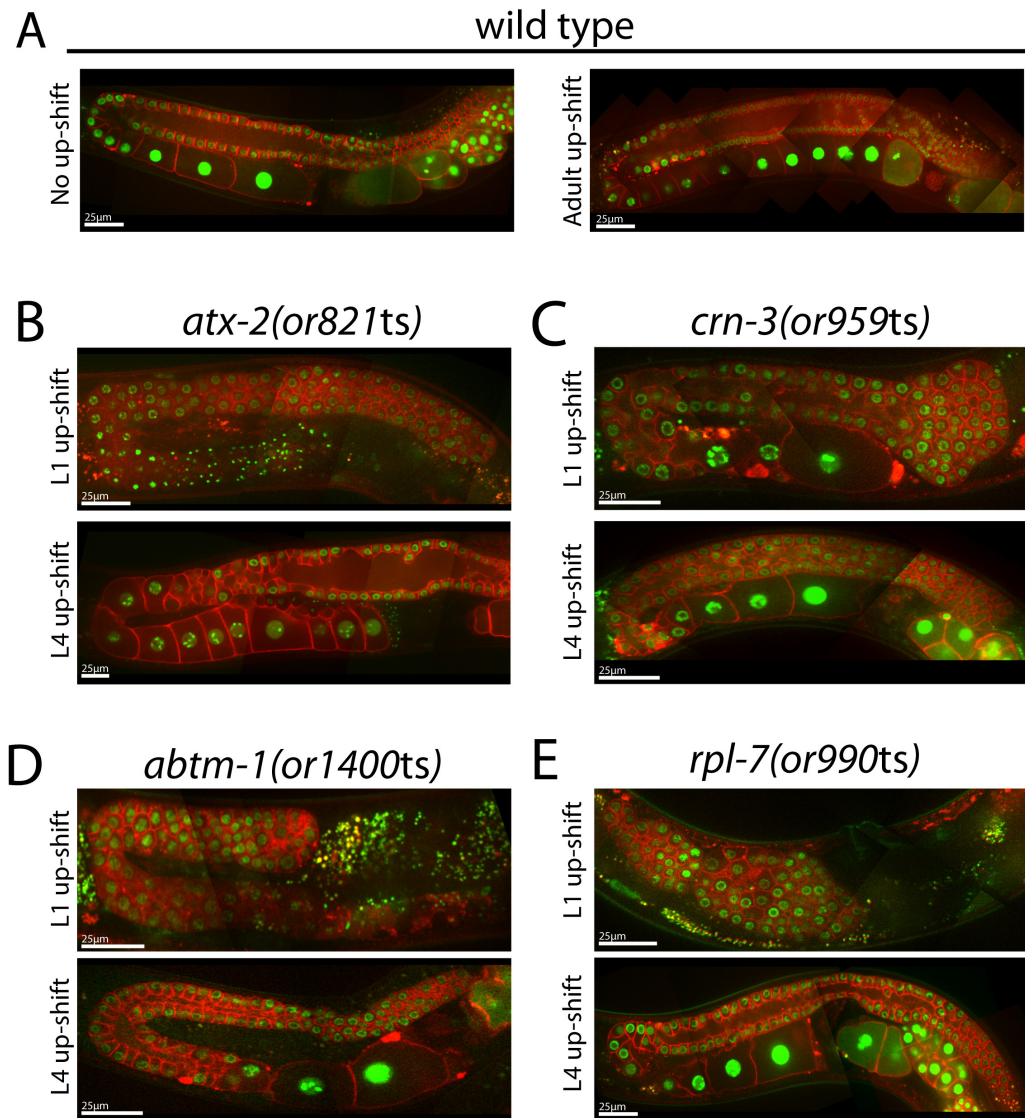

**Figure S2** Adult germline defects in wild type and in *atx-2(or821ts)*, *crn-3(or959ts)*, *abtm-1(or1400ts)*, and *rpl-7(or990ts)* mutants following temperature up-shifts to the restrictive temperature (26°C) at the L1 and L4 larval stages. Composite images were prepared as previously described (Figure 3) for the adult hermaphrodite gonad in wild type (A) and mutants (B-E).
