# Supplementary material for: High-Throughput Cloning of Temperature-Sensitive Caenorhabditis elegans Mutants with Adult Syncytial Germline Membrane Architecture Defects
Source: PubMed Central journal article supplement (PMC4632044; doi:10.1534/g3.115.021451), 2015-08-26
Supplement: supp_g3.115.021451_FigureS4.pdf [file supp_g3.115.021451_FigureS4.pdf]

Figure S4

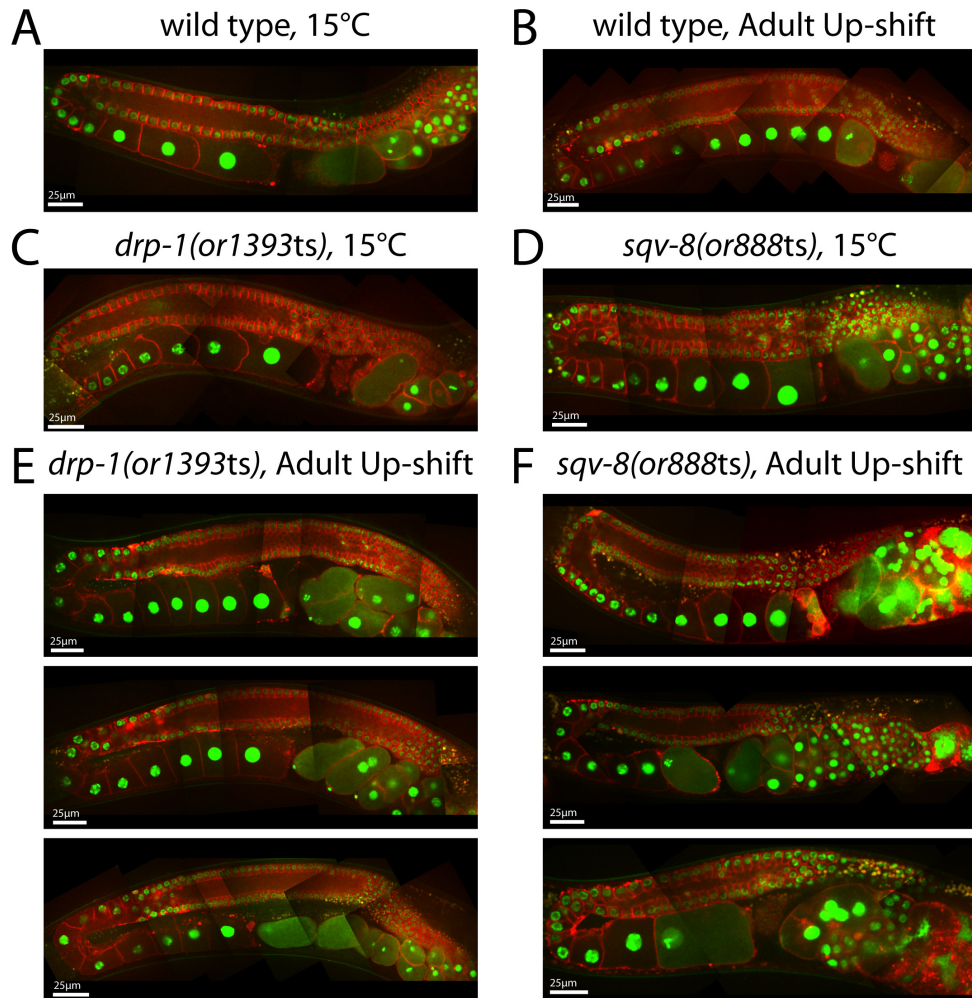

**Figure S4** Lack of germline defects in *drp-1(or1393ts)* and *sqv-8(or888ts)* mutants after young adults were up-shifted to the restrictive temperature (26°C). Composite images of the germline were prepared as previously described for wild type (A, B), *drp-1(or1393ts)* (C, E), and *sqv-8(or888ts)* (D, F) worms. These animals were either grown entirely at 15°C, or shifted to 26°C as young adults for 18 hours.
