# Supplementary material for: High-Throughput Cloning of Temperature-Sensitive Caenorhabditis elegans Mutants with Adult Syncytial Germline Membrane Architecture Defects
Source: PubMed Central journal article supplement (PMC4632044; doi:10.1534/g3.115.021451), 2015-08-26
Supplement: supp_g3.115.021451_TableS1.pdf [file supp_g3.115.021451_TableS1.pdf]

**Table S1 Complementation test results that identified causal mutations in ten temperature-sensitive Osm/Ste mutants.** Percent embryonic lethality was scored at 26°C for each genotype, followed by the number of embryos scored in parentheses.

| Genotype                     | Embryonic Lethality 26°C | Genotype                       | Embryonic Lethality 26°C |
|------------------------------|--------------------------|--------------------------------|--------------------------|
| <i>or821ts</i>               | 99.6% (715)              | <i>or1235ts</i>                | 100% (117)               |
| <i>or821ts/+</i>             | 8.3% (144)               | <i>or1235ts/+</i>              | 3.6% (446)               |
| <i>or821ts/atx-2(tm4373)</i> | 98.8% (254)              | <i>or1235ts/vps-15(ok3132)</i> | 99.0% (517)              |
| <i>atx-2(tm4373)/+</i>       | 13.2% (371)              | <i>vps-15(ok3132)/+</i>        | 19.6% (255)              |
| <i>or888ts</i>               | 99.7% (311)              | <i>or1393ts</i>                | 99.7% (294)              |
| <i>or888ts/+</i>             | 2.0% (250)               | <i>or1393ts/+</i>              | 1.1% (363)               |
| <i>or888ts/sqv-8(n2822)</i>  | 99.5% (198)              | <i>or1393ts/drp-1(tm1108)</i>  | 88.2% (493)              |
| <i>sqv-8(n2822)/+</i>        | 1.07% (280)              | <i>drp-1(tm1108)/+</i>         | 4.8% (399)               |
| <i>or959ts</i>               | 74.6% (405)              | <i>drp-1(tm1108)</i>           | 90.1% (272)              |
| <i>or959ts/+</i>             | 2.6% (288)               | <i>or1400ts</i>                | 100% (181)               |
| <i>or959ts/crn-3(ok2269)</i> | 80.6% (139)              | <i>or1400ts/+</i>              | 3.9% (442)               |
| <i>crn-3(ok2269)/+</i>       | 8.2% (195)               | <i>or1400ts/abtm-1(tm2721)</i> | 100% (540)               |
| <i>crn-3(ok2269)</i>         | 91.0% (167)              | <i>or1572ts</i>                | 100% (465)               |
| <i>or990ts</i>               | 93.8% (130)              | <i>or1572ts/+</i>              | 1.1% (366)               |
| <i>or990ts/+</i>             | 2.9% (450)               | <i>or1572ts/ippk-1(tm4718)</i> | 100% (247)               |
| <i>or1247ts</i>              | 97.5% (81)               | <i>ippk-1(tm4718)/+</i>        | 3.2% (342)               |
| <i>or1247ts/+</i>            | 1.8% (325)               |                                |                          |
| <i>or990ts/or1247ts</i>      | 78.0% (91)               |                                |                          |
| <i>or1088ts</i>              | 84.9% (179)              |                                |                          |
| <i>or1088ts/+</i>            | 4.5% (220)               |                                |                          |
| <i>or1088ts/ndg-4(sa529)</i> | 91.2% (239)              |                                |                          |
| <i>ndg-4(sa529)/+</i>        | 1.9% (266)               |                                |                          |
| <i>ndg-4(sa529)</i>          | 100%                     |                                |                          |
