# Supplementary material for: High-Throughput Cloning of Temperature-Sensitive Caenorhabditis elegans Mutants with Adult Syncytial Germline Membrane Architecture Defects
Source: PubMed Central journal article supplement (PMC4632044; doi:10.1534/g3.115.021451), 2015-08-26
Supplement: supp_g3.115.021451_TableS2.pdf [file supp_g3.115.021451_TableS2.pdf]

**Table S2 Strains used for complementation tests that identified causal mutations.** The mutations in these strains failed to complement the Osm/Ste mutations we tested (see Figure 1 and Table S1). No alleles are available for *rpl-7*, but our two TS Osm/Ste alleles failed to complement each other (see text). \*Phenotype description from Shohei Motani (National Bio-Resource Project of the MEXT, Japan); +Phenotype description from the *C. elegans* Knockout Consortium.

| Strain Name | Genotype                              | Allele Phenotype                   |
|-------------|---------------------------------------|------------------------------------|
| FX02721     | <i>abtm-1(tm2721)/+</i> I             | Let/Ste*                           |
| FX14556     | <i>+/hT2 I; atx-2(tm4373)/hT2 III</i> | Let/Ste*                           |
| VC1715      | <i>crn-3(ok2269)</i> II               | Emb Let (Table S1)                 |
| EU2900      | <i>drp-1(tm1108)</i> IV               | Emb Let (Table S1; Lu et al, 2011) |
| FX14701     | <i>ippk-1(tm4718)/mIn1 II</i>         | Let/Ste*                           |
| JT529       | <i>ndg-4(sa529)</i> III               | Emb Let (Table S1)                 |
| MT7483      | <i>sqv-8(n2822)/mnC1 II</i>           | Emb Let (Herman et al, 1999)       |
| VC2382      | <i>vps-15(ok3132)/mIn1 II</i>         | Larval arrest <sup>+</sup>         |
